# Supplementary material
Source: Springer Nature journal article supplement (https://www.springermedizin.de/resource/supplementary/12891_2010_1124_MOESM4_ESM.pdf/9507752)

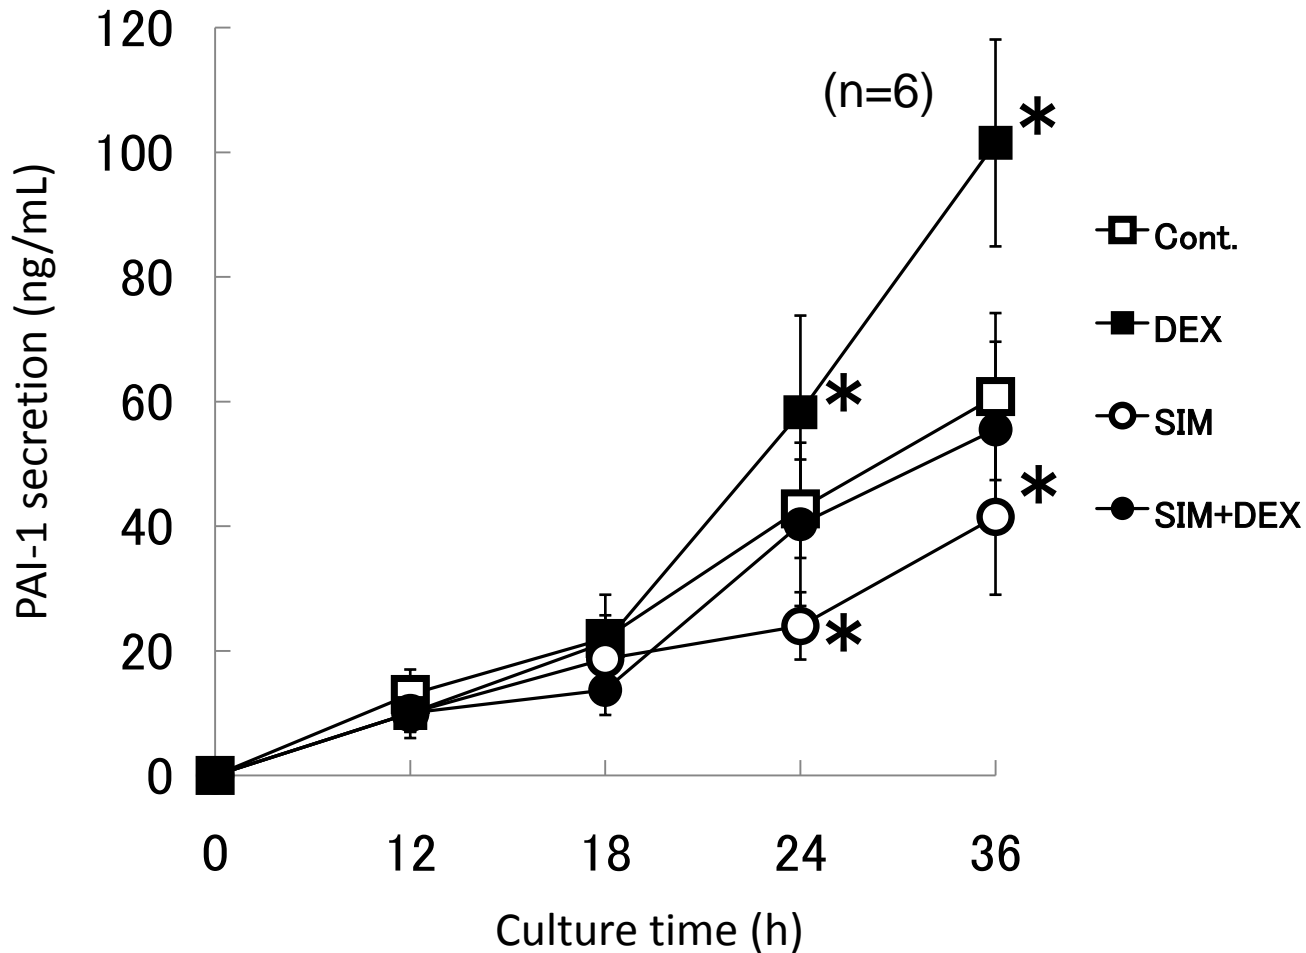

Supplement: MOESM4 [file 9507752]
